# Supplementary material for: Tailoring Pt-loaded MoS 2 /SnO 2 heterostructures for high-sensitivity room-temperature ammonia detection: a DFT and COMSOL analysis
Source: Royal Society of Chemistry journal article supplement (doi:10.1039/d5ta07648j), 2026-01-01
Supplement: d5ta07648j1.pdf [file d5ta07648j1.pdf]

### Supporting Information

## Tailoring Pt-Loaded $\text{MoS}_2/\text{SnO}_2$ Heterostructures for High-Sensitivity Room-Temperature Ammonia Detection: A DFT and COMSOL Analysis

Raiyan Al Nahean, Manik Bala, Md Tawabur Rahman\*, MD Raiyan Firoz

Department of Electrical and Electronic Engineering, Khulna University of Engineering & Technology, Khulna-9203, Bangladesh

\*Corresponding Author: [tawabur@eee.kuet.ac.bd](mailto:tawabur@eee.kuet.ac.bd)

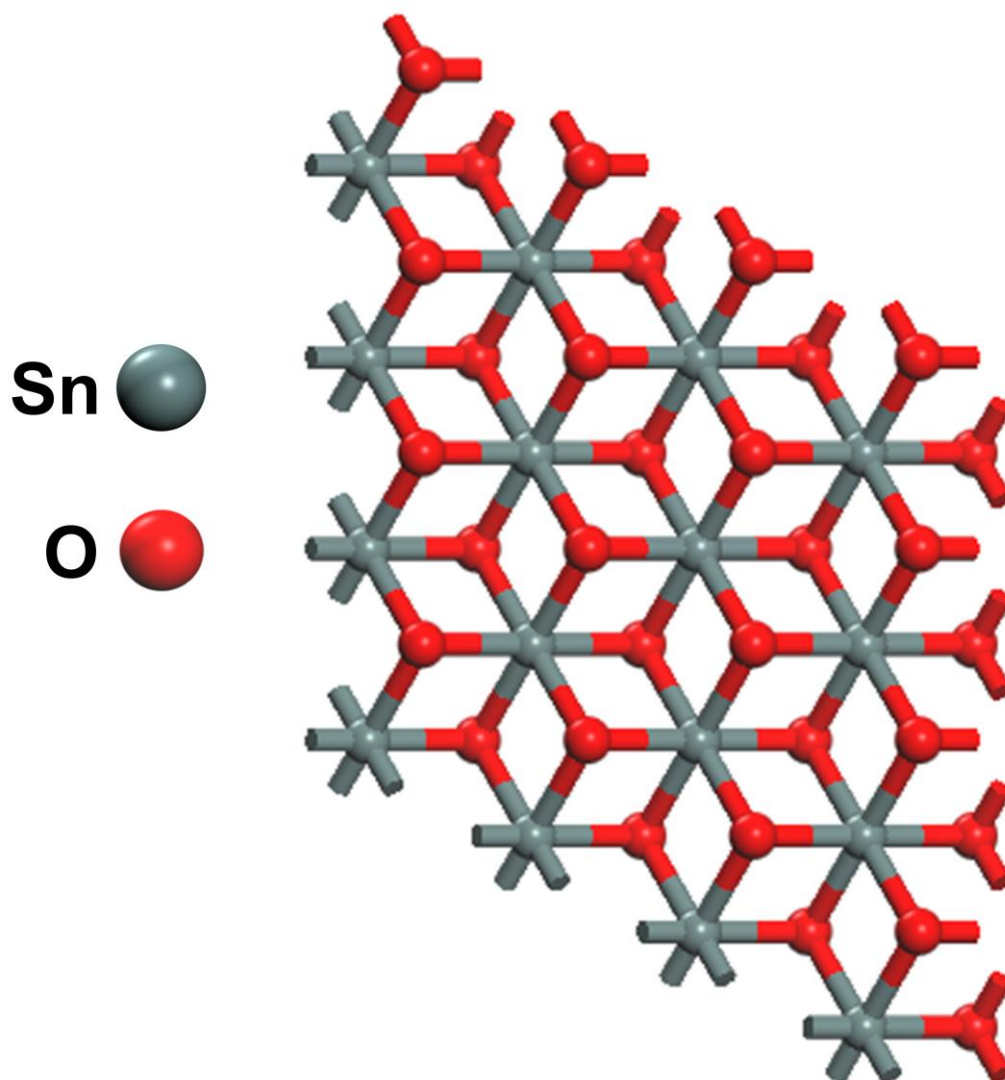

Fig. S11. 2D hexagonal  $\text{SnO}_2$  monolayer (top view).

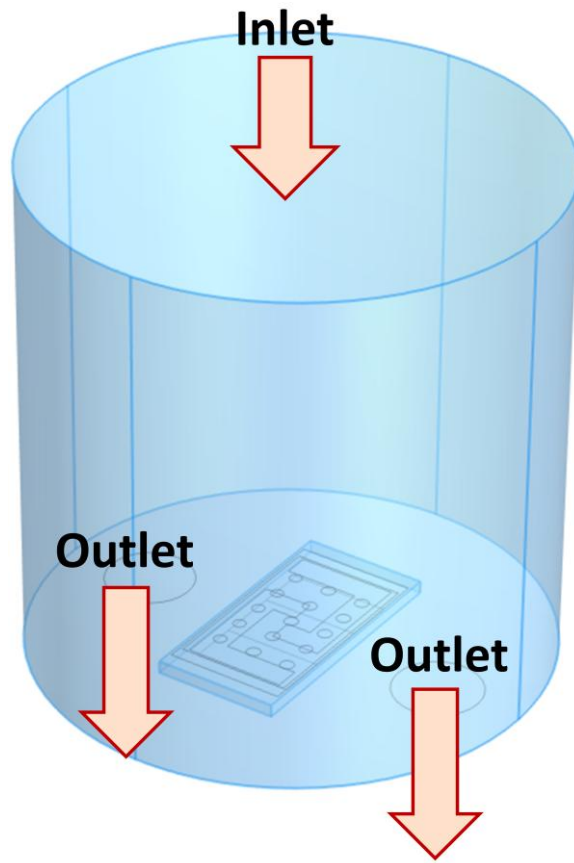

Fig. SI2. Gas chamber model of the proposed gas sensor.

Table S I The lattice constant; bond lengths of Mo-S ( $d_1$ ) and Sn-O ( $d_2$ ); bond angles of Mo-S-Mo ( $\theta_1$ ), S-Mo-S ( $\theta_2$ ), Sn-O-Sn ( $\theta_3$ ), and O-Sn-O ( $\theta_4$ ); the band gap ( $E_g$ ); and VBM/CBM positions.

| Lattice Constant ( $\text{\AA}$ ) | $d_1(\text{\AA})$<br>$d_2(\text{\AA})$ | $\theta_1(^{\circ})$<br>$\theta_3(^{\circ})$ | $\theta_2(^{\circ})$<br>$\theta_4(^{\circ})$ | Interlayer Distance ( $\text{\AA}$ ) | $E_g$ (eV) | Stability          | VBM/CBM Positions |
|-----------------------------------|----------------------------------------|----------------------------------------------|----------------------------------------------|--------------------------------------|------------|--------------------|-------------------|
| $a = b = 6.24$                    | 2.401<br>2.008                         | 80.82°<br>83.16°<br>101.57°<br>78.45°        |                                              | 3.36                                 | 2.063      | Dynamically Stable | M/T               |

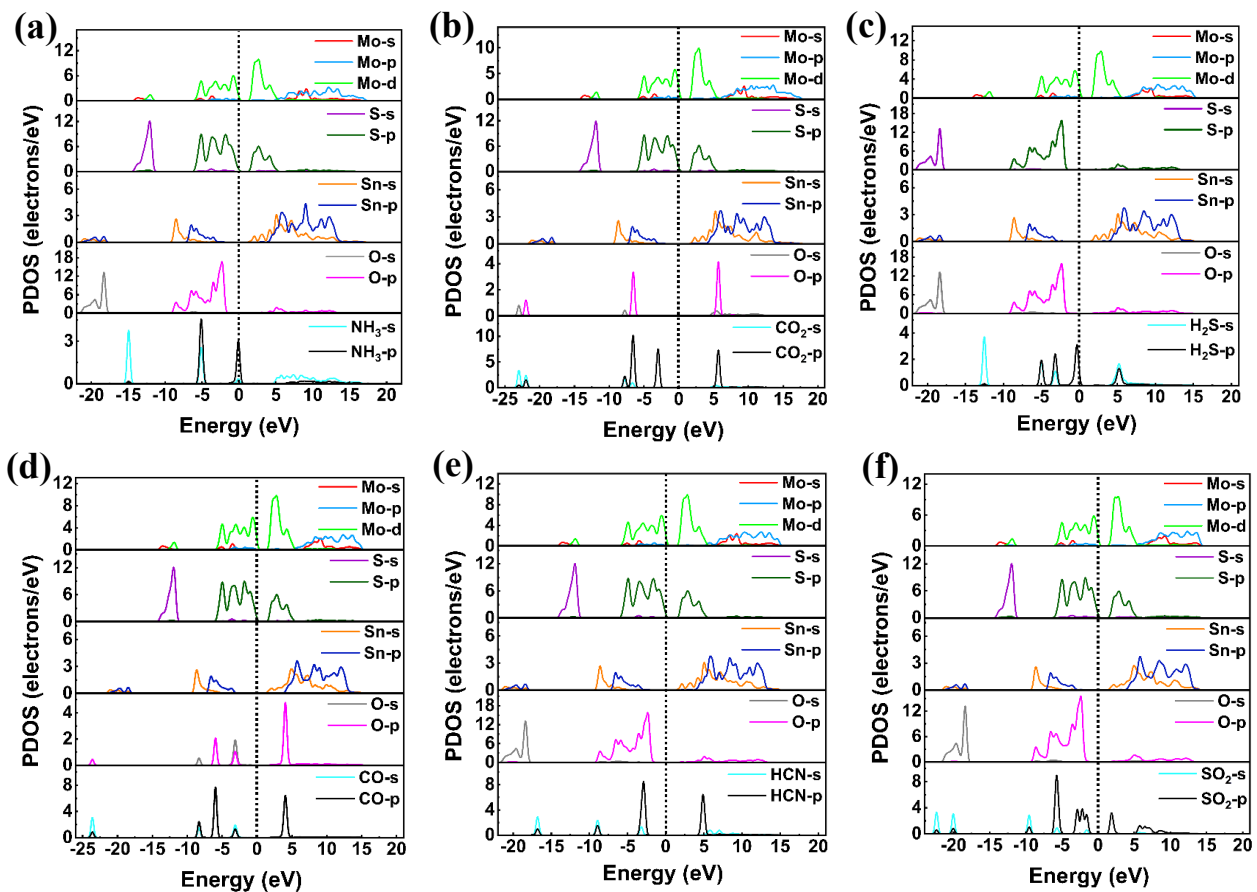

Fig. SI3. The PDOS of MoS<sub>2</sub>/SnO<sub>2</sub> heterostructures adsorbed with (a) NH<sub>3</sub>, (b) CO<sub>2</sub>, (c) H<sub>2</sub>S, (d) CO, (e) HCN, and (f) SO<sub>2</sub> molecules.

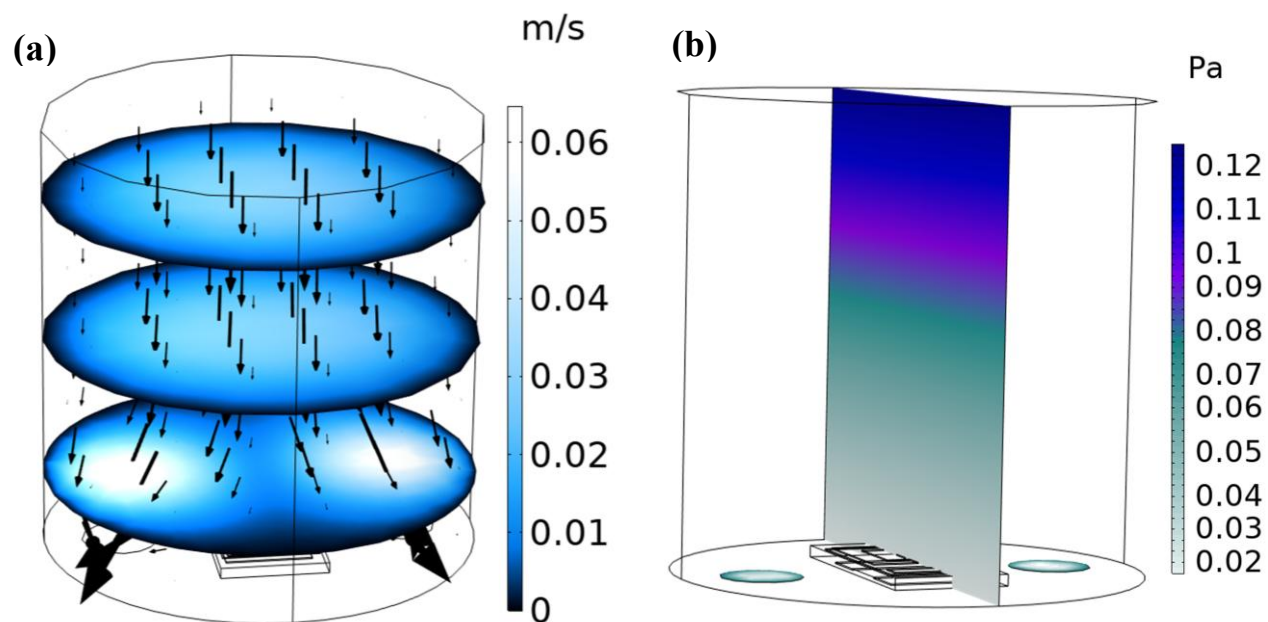

Fig. SI4 (a) Velocity and (b) pressure distribution of  $\text{NH}_3$  gas as it flows through the gas chamber from the inlet to the outlet

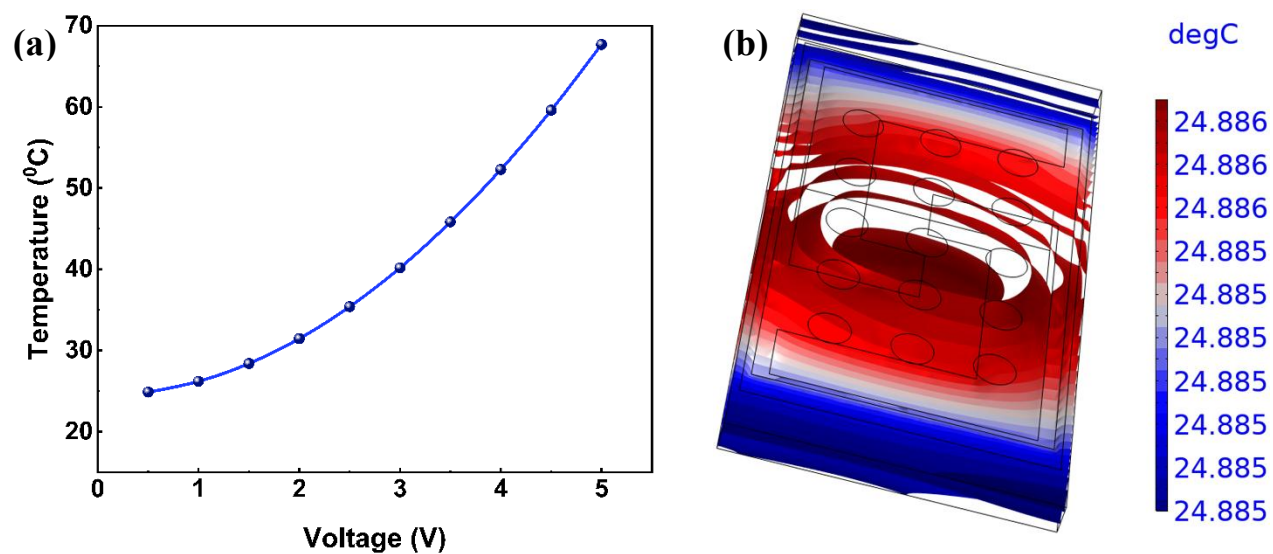

Fig. SI5. (a) Temperature versus voltage characteristics of the  $\text{Pt-MoS}_2/\text{SnO}_2$  sensor for varying heater voltage from 0.5 to 5 V. (b) Isothermal contour of the sensor surface at 0.5 V.
